# Supplementary material
Source: PubMed Central journal article supplement (PMC8229847)
Supplement: sj-pdf-1-vdi-10.1177_10406387211022466.pdf [file sj-pdf-1-vdi-10.1177_10406387211022466.pdf]

JVDI: Supplementary material

Williams LBA, et al. Clinical and pathologic findings in an outbreak in rabbits of natural infection by rabbit hemorrhagic disease virus 2 in the northwestern United States

**Supplementary Table 1.** Summary of rabbit signalment, husbandry characteristics, and pathologic findings in the 7 cases submitted to WADDL. Cases are numbered chronologically based on submission date to WADDL.

| Case | No. of rabbits confirmed RHDV2 positive | Geographic location | Signalment                                                     | Management type | Clinical signs             | Histologic lesions                                                                                                                                                                                                         |
|------|-----------------------------------------|---------------------|----------------------------------------------------------------|-----------------|----------------------------|----------------------------------------------------------------------------------------------------------------------------------------------------------------------------------------------------------------------------|
| 1    | 1                                       | Orcas Island        | 2-y-old, Norwegian dwarf buck                                  | Private (4-H)   | Sudden death               | Multifocal random hepatic and splenic necrosis; pulmonary edema                                                                                                                                                            |
| 2    | 3                                       | Orcas Island        | Variously aged feral domestic rabbits, 2 adults and 1 juvenile | Feral           | Found dead                 | Multifocal random hepatic necrosis; no spleen evaluated; multifocal mild pulmonary hemorrhage and pulmonary congestion                                                                                                     |
| 3    | 3                                       | Orcas Island        | Two 8-wk-old male kits and one 12-w-old female kit             | Farmed          | Lethargy and anorexia <1 d | Multifocal random hepatic necrosis; diffuse splenic necrosis; multifocal lymphohistiocytic interstitial pneumonia                                                                                                          |
| 4    | 1                                       | San Juan Island     | Adult feral domestic rabbit                                    | Caged outdoors  | Sudden death               | Multifocal random hepatic and splenic necrosis; pulmonary edema and congestion                                                                                                                                             |
| 5    | 2                                       | Orcas Island        | One 4-wk-old kit and 1 adult doe, New Zealand dwarfs           | Breeding farm   | Sudden death               | Multifocal random hepatic and splenic necrosis; centrilobular hepatocellular degeneration; renal glomerular thrombosis, focal lymphoplasmacytic interstitial nephritis and fibrosis, and tubular necrosis with pigmenturia |

Natural outbreak of rabbit hemorrhagic disease virus 2

|   |   |                |                             |                                      |              |                                                                                                                    |
|---|---|----------------|-----------------------------|--------------------------------------|--------------|--------------------------------------------------------------------------------------------------------------------|
| 6 | 1 | Whidbey Island | Adult feral domestic rabbit | Feral domestic                       | Found dead   | Autolysis                                                                                                          |
| 7 | 3 | Sequim         | 3 adult rabbits             | Rescue organization; housed outdoors | Sudden death | Multifocal random hepatic necrosis, lymphoplasmacytic periportal hepatitis; renal tubular necrosis and pigmenturia |
